# Supplementary material for: Type I-like behavior of the type II α7 nicotinic acetylcholine receptor positive allosteric modulator A-867744
Source: PeerJ. 2019 Sep 2;7:e7542. doi: 10.7717/peerj.7542 (PMC6727837; doi:10.7717/peerj.7542)
Supplement: Supplemental Information 2 — Summary of all experiments with the “PRE”, “CO”, and “POST” protocols. Current traces from individual cells are shown, as well as the major parameters obtained from these currents. [file peerj-07-7542-s003.xlsx]

## Sheet: Fig1__Pre__A-C
			CE	CG	CN	CP	CT	CO	CX		CE	CG	CN	CP	CT	CO	CX		CE	CG	CN	CP	CT	CO	CX		CE	CG	CN	CP	CT	CO	CX		CE	CG	CN	CP	CT	CO	CX		CE	CG	CN	CP	CT	CO	CX
			2015_05_13_0031					2015_06_16_0012					2015_06_16_0015						2015_06_16_0020					2015_06_16_0030					2015_06_19_0005						2015_06_21_0022						2015_06_26_0012
			rel peak											rel auc	rel auc	rel auc	rel auc	rel auc	rel auc	rel auc	rel auc	av.				tau deact	tau deact	tau deact	tau deact	tau deact	tau deact	tau deact	tau deact	av.			tau2	tau2	tau2	tau2	tau2	tau2	tau2	tau2	av.			rel. plateau	pl
		6	1	1	1	0.999909	1	1	1	1	0.999989	1.13745e-05		7.00501	9.43079	64.9644	18.4431	51.9928	12.4539	13.6923	271.354	25.7019	31.6622					5.10892		8.26455		4.24229	2.79034	4.72826	1.15775		95.7332	144.903	130.078	119.657	125.412	116.917	168.796	49.6062	118.888	12.447		0.0235734	0.000369306
		11	0.959959	0.711421	0.729864	0.772438	0.622883	1.19182	1.15309	0.925255	0.883341	0.0742584		9.45572	11.7173	39.1721	19.4	39.6426	24.1513	23.2798	214.3	28.2196	24.1285					5.59394		3.67037		3.61598	2.16348	3.56002	0.703622		99.9485	74.8142	118.2	129.158	128.48	99.9919	157.547	140.144	118.535	9.25969		0.028904	0.00729831
		16	0.926365	0.64776	0.582178	0.866293	0.522044	1.02682	1.23034	0.865513	0.833414	0.0845414		12.1942	13.717	34.7134	34.7837	39.9911	31.9319	30.2293	210.301	33.639	23.0362					4.5419		2.18395		6.58799	1.28609	3.02779	1.19599		59.9158	91.8037	137.197	137.327	117.523	95.2945	133.775	146.344	114.897	10.6007		0.0354049	0.00559155
		26	0.804637	0.8291	0.624175	1.06197	0.601462	1.00179	1.31454	0.818656	0.882041	0.083645		11.5074	23.1262	46.1281	55.687	44.937	39.5904	40.7653	197.189	42.0505	20.5726					5.5656		2.44791		5.8579	1.54841	3.33414	1.08927		124.635	116.443	137.731	152.905	164.637	96.2827	114.465	105.626	126.59	8.31949		0.0398404	0.00623098
		46	0.949384	0.968673	0.73939	1.09332	0.720363	1.03183	1.49943	0.856658	0.982381	0.0873081		19.801	45.7394	72.8126	100.987	61.1095	61.9456	69.426	233.35	67.0483	22.9602					2.26655		6.98817		6.26134	1.96405	3.73583	1.31165		83.1162	131.938	151.196	164.25	167.261	123.825	114.529	108.442	130.57	10.3097		0.0273302	0.00487956
		86	1.18729	1.34695	0.943462	1.55097	1.06864	1.14751	1.78754	0.974233	1.25082	0.104049		54.557	87.4754	109.945	151.362	85.9048	92.648	111.107	271.922	108.423	23.7142					2.56467		3.82818		3.4034	2.1577	2.91395	0.381561		99.6885	135.929	168.306	166.884	138.213	147.093	123.514	111.223	136.356	8.67342		0.0209827	0.00801676
		166	1.54116	2.00402	1.16491	2.4572	1.55759	1.45738	2.28659	1.05148	1.69004	0.180295		96.7103	145.817	152.693	220.412	128.512	136.946	177.027	334.651	162.857	26.2666					4.01996		2.60723		3	1.54123	2.63844	0.512324		89.3842	136.417	194.585	175.623	126.417	132.202	131.614	111.012	137.157	11.8883		0.0319023	0.00810252
		326	1.70779	2.59301	1.3081	3.15583	1.95903	1.85216	2.85233	1.08282	2.06388	0.260846		130.453	197.243	195.331	316.248	169.217	166.308	244.475	377.917	212.339	29.6511					2.7593		1.97011		1.7094	1.7557	2.00977	0.243601		97.7537	143.236	244.322	198.232	138.781	135.118	148.611	112.268	152.29	16.7595		0.0331523	0.0202906
		646	2.08939	2.67999	1.3365	3.31934	2.16076	1.9739	3.11089	1.14897	2.22747	0.274583		177.478	227.745	225.466	347.645	226.159	211.867	309.537	417.847	258.005	28.9852					6.21744		2.8568		2	2.03441	2.91568	0.999895		101.803	158.528	260.308	210.898	148.174	145.534	169.388	125.672	165.038	17.6544		0.0996177	0.0128277
		1286	2.32111	2.56232	1.31925	3.75774	2.29518	1.93054	3.09281	1.13816	2.30214	0.306799		233.549	245.849	268.709	411.035	301.002	225.702	361.061	443.22	301.866	29.7015					3.57527		3.37048		3	2.73015	3.15194	0.188591		118.182	175.885	336.577	232.92	188.996	150.736	200.773	123.26	190.916	24.925		0.124522	0.0237247
		2566	1.8229	2.48235	1.32747	3.92915	2.42731	1.82252	3.11588	1.09214	2.25247	0.333047		245.338	264.12	322.669	441.414	400.101	279.732	430.787	480.366	347.728	32.1497					4.27653		3.64775		5	2.41869	3.70609	0.547204		166.073	181.598	436.366	227.149	237.998	245.241	251.774	121.583	233.473	33.1265		0.149427	0.0825841
	slope 6 ms		0.65	2.3	2.4		1.65	0.61	0.95		1.42667	0.305068
	slope 2566 ms		1.25	3.14	5.15		2.2	4.35	1.15		2.87333	0.620906
			1.92308	1.36522	2.14583		1.33333	7.13115	1.21053		2.51819	0.865454
	ttest	0.0574465
[truncated: 7 more columns]

## Sheet: Fig2__Pre__A-AC
			2015_06_09_0016					2015_06_21_0027				2015_06_11_0011				2015_10_01_0012					2015_10_01_0008					2015_10_02_0009					2015_05_20_0015						2015_06_16_0024
				0												0												0									tau deact
8		6		1	1	1	1	1	1	1	1	1	0			505.348	297.172	42.5063	179.623	225.485	724.243	866.149	303.087	289.366	99.9927			595.563	676.054	305.687	555.631	149.115	1123.23	604.124	507.046	486.592	4.57372	4.79232	5	5.324	2.54476	12.98	13.0595	4.92236	5.77604	1.42196
		11		1.8228	1.87837	1.11629	1.65777	1.02753	0.863716	1.25534	0.988641	1.32631	0.141898			582.984	384.272	51.9798	746.175	248.018	728.395	939.76	316.287	383.367	105.594			535.672	714.133	130.188	581.256	169.907	822.291	537.439	306.061	458.004	4.15008	4.50009	4.84045	10	1.69286	12.506	10.6233	4.31919	5.5328	1.372
		16		1.88233	1.83213	1.10423	1.94906	1.07438	0.969399	1.21893	0.993557	1.378	0.152004			616.034	401.979	60.5889	858.028	268.69	707.616	931.538	327.631	406.6	108			634.616	699.399	147.539	774.485	200.606	1018.14	657	461.791	457.81	3.73315	4.14334	1.95649	9.37924	3.23284	12.5503	12.7645	4.31059	5.31167	1.54377
		26		2.08111	1.96437	1.11023	2.05206	1.14257	0.83581	1.20017	1.10469	1.43638	0.178921			656.356	422.976	69.8738	919.543	327.276	699.559	925.471	355.919	437.622	107.328			678.959	697.321	137.623	838.651	210.929	580.191	647.832	446.922	457.015	5.06747	5.44431	2.07833	10.6556	5	12.0664	12.1395	4.24142	6.09236	1.3847
		46		2.28832	2.40685	1.15002	2.15969	1.17849	0.846318	1.20252	1.23239	1.55808	0.218162			717.563	444.194	91.8362	1012.04	379.039	683.744	949.43	397.236	481.634	110.454			552.302	482.838	146.857	591.613	234.784	1232.49	586.948	490.365	400.428	4.18903	4.51477	3	10.7935	9.07387	12.6776	10.6757	4.20228	6.49334	1.34377
		86		2.79225	2.77269	1.2062	2.23226	1.2562	0.926286	1.23528	1.48019	1.73767	0.264553			815.005	461.785	121.674	1068.98	523.495	705.73	992.052	432.503	544.791	111.8			604.795	317.86	133.812	715.846	368.876	1268.46	714.826	308.978	494.953	4.63075	11.8387	3	11.5941	4.27229	12.2371	10.5199	4.13051	6.75435	1.44409
		166		3.48691	2.9952	1.42213	2.29054	1.31173	1.13612	1.27045	1.71502	1.95351	0.311559			835.291	488.897	157.611	1127.93	644.828	769.734	1025.38	465.438	601.772	112.446			474.886	359.251	133.861	513.607	447.227	519.878	489.921	494.732	419.711	3.27156	2.56297	2	11.5958	6.41033	13.9365	11.6929	4.01305	5.4816	1.68546
		326		4.06044	3.17342	1.66101	2.29039	1.30525	1.28408	1.28448	1.86307	2.11527	0.359593			944.852	527.922	189.055	1161.99	764.005	800.184	1015.47	492.174	654.033	112.598			582.788	302.056	140.438	768.129	631.271	807.142	751.383	495.41	458	5.32867	4	1.30702	13.2225	7.82785	13.2728	10.6211	4.52927	6.06924	1.58149
		646		4.33103	3.48233	1.75411	2.25428	1.30003	1.51011	1.32794	1.89456	2.2318	0.390032			983.981	554.091	232.835	1215.51	853.666	872.194	1049.77	507.151	705.202	115.166			498.524	363.741	147.655	446.771	655.133	499.27	458.69	536.546	500.328	4.35903	4.0592	3.34933	14.5946	9.53793	14.3051	12.5356	4.20553	7.06702	1.74186
		1286		3.9828	3.85322	1.77381	2.19459	1.23818	1.66598	1.41642	1.83853	2.24544	0.378711			999.505	601.842	283.823	1254.56	903.787	920.289	1073.31	513.958	748.267	114.256			585.392	480.107	187.569	577.927	530.806	350	527.129	648.915	#NUM!	5.02357	5.80273	2.57493	14.5191	10.762	13.7064	11.3311	4.30444	7.27436	1.62864
		2566		3.84257	3.90203	1.6948	2.13464	1.14391	1.82791	1.45887	1.79983	2.22557	0.373507			1102.12	642.513	334.863	1287.01	892.778	1037.58	1071.02	526.949	794.99	115.887			631.444	501.23	211.348	569.588	503.432	350	617.692	946.945	#NUM!	3.97318	6.77249	2.89422	14.9675	10.891	15.1356	13.9131	4.32351	7.63594	1.84322
																																													6.27346	1.63395
											2015_06_11_0008	1.5	1.5	1
											2015_06_21_0027	1.5	2	1.33333
											2015_06_11_0011	1	1.18402	1.18402
											2015_06_09_0016	1	3	3
											2015_10_01_0012	3	5	1.66667
											2015_10_01_0008	3	9.5	3.16667
											2015_10_02_0009	6	8	1.33333
											2015_05_20_0015	1.5	1.5	1
											2015_06_16_0024	2.5	3.5	1.4
												2.33333	3.90934	1.676
												0.559017	1.06694	0.291606

## Sheet: Fig3__Pre__P-C
				2015_06_28_0009						2015_07_08_0011						2015_07_08_0019						2015_07_18_0011						2015_09_16_0005							2015_09_17_0015					2017_04_25_0006						2017_04_25_0011
				rel peak	rel peak	rel peak	rel peak	rel peak	rel peak	rel peak	rel peak	rel peak	rel peak	rel peak					tau2	tau2	tau2	tau2	tau2	tau2	tau2	tau2	tau2	tau2	tau2					rel ampl	rel ampl	rel ampl	rel ampl	rel ampl	rel ampl	rel ampl	rel ampl	rel ampl	rel ampl	rel ampl
		1	6	1	1	1	1	1	1	1	1	1	1	1	1	0			41.5927	19.073	25.5512	74.4959		8.98853	17.8245	30.9829	42.5289	8.47461	10.7906	22.2058	6.49331			0.0379144	0.0542048	0.036014	0.0250808	0.067145	0.217011	0.0429195	0.0713591	0.10328	0.0461398	0.0657111	0.0581979	0.0160967
		2	11	0.970009	0.904898	0.867486	1.08071	0.988025	0.93771	0.99078	1.06793	0.935402	1	0.889265	0.966565	0.020644			50.6018	22.613	37.2864	64.8614		10.6396	18.9994	48.2745	77.1146	47.6617	38.3946	36.1495	6.51784			0.0654889	0.107653	0.0672825	0.083772	0.0426055	0.135203	0.0568756	0.0608618	0.0817352	0.00663201	0.128967	0.0623533	0.0113274
		3	16	1.01062	0.845081	0.909594	1.10585	1.0163	0.954796	0.978238	1.04002	0.872583	1.10252	0.800502	0.966919	0.0305083			42.5084	36.0408	41.8653	98.197		12.495	29.6815	31.2802	107.785	33.987	54.2527	41.3238	9.66636			0.0819966	0.174529	0.0947136	0.0838068	0.0462722	0.296684	0.071812	0.0364535	0.0773106	0.00438767	0.0898011	0.06711	0.0237738
		4	26	0.917046	0.93946	0.817472	1.12319	0.972995	0.963755	0.971071	1.00151	0.838947	1.02079	0.706081	0.933847	0.0339173			58.088	41.9216	41.4693	120.344		18.7282	13.4129	24.3185	64.6918	23.9302	60.4647	38.3877	10.0146			0.0548878	0.193908	0.0861644	0.0838335	0.0431359	0.213408	0.0865364	0.0566073	0.131188	0.0107779	0.0933915	0.0755515	0.0186472
		5	46	0.899744	0.835549	0.87449	1.07627	0.913915	0.914557	0.979979	0.875922	0.797937	1.09328	0.72587	0.907956	0.0331193			131.965	47.0312	38.9712	104.133		33.1876	42.6984	60.082	70.5414	59.8303	67.8171	60.0899	9.78157			0.0528686	0.329824	0.0764982	0.104795	0.0525718	0.198524	0.0797255	0.0747715	0.120533	0.0220546	0.1674	0.091732	0.0264108
		6	86	0.858722	0.767387	0.785173	1.10864	0.920348	0.841769	0.937303	0.864644	0.827405	1.20582	0.67869	0.890537	0.0456512			174.538	65.2384	55	75.1066		45.3257	49.7456	68.7661	90.5466	71.7494	84.5648	72.4901	11.6479			0.140659	0.253731	0.233951	0.104907	0.0845758	0.228279	0.0715114	0.0941352	0.121637	0.00861143	0.181472	0.10727	0.0233448
		7	166	0.860974	0.692326	0.847728	1.05174	0.8634	0.88714	0.953835	0.807531	0.83706	1.21442	0.662912	0.879916	0.046511			284.707	63.0393	64.5199	99.9533		28.1118	59.837	86.4975	81.8338	109.12	212.205	89.2062	24.9223			0.191675	0.326642	0.26787	0.208246	0.100176	0.421083	0.0833075	0.0872651	0.160715	0.0554787	0.235249	0.163596	0.0342809
		8	326	0.841597	0.700072	0.61187	1.09011	0.829806	0.74327	0.986301	0.779848	0.764723	1.2279	0.709388	0.844081	0.0557327			252.301	74.3581	34.3469	249.413	167.559	35.2298	106.759	140.238	196.593	105.736	474.455	127.121	38.271			0.232189	0.254863	0.154474	0.207935	0.143867	0.501785	0.111699	0.103127	0.200516	0.0777248	0.242258	0.178792	0.0349339
		9	646	0.93057	0.665651	0.689599	1.04412	0.850562	1.16271	0.933421	0.754366	0.751402	1.15851	0.762915	0.882167	0.053842			247.99	47.084	37.6077	301.057	219.411	52.0732	390.981	256.034	245.987	399.216	268.45	172.351	38.6362			0.532723	0.235135	0.0867425	0.26195	0.239613	0.751908	0.107971	0.159822	0.21521	0.0947153	0.445446	0.226463	0.0630716
		10	1286	0.93022	0.614172	0.836032	1.06514	0.886777	1.06682	0.974087	0.69684	0.736505	1.23985	0.733518	0.889087	0.0569991			378.295	54.7482	87.4642	455.811	222.965	85.6763	370.345	470.835	397.798	388.619	402.922	242.6	47.6463			0.666883	0.21531	0.241184	0.404741	0.394471	0.915355	0.223596	0.20533	0.327764	0.229212	0.602295	0.352722	0.0700951
		11	2566	1.1156	0.463249	0.666112	1.08579	0.99143	1.16383	0.985077	0.678448	0.731534	1.31157	0.76362	0.905115	0.0784412			464.365	41.916	102.162	602.195	228.243	47.6089	802.247	621.415	563.259	573.951	457.802	283.751	78.9541			0.904881	0.393291	0.528812	0.543564	0.558325	1.2581	0.352811	0.246621	0.386105	0.260527	0.526032	0.482614	0.0901443
[truncated: 13 more columns]

## Sheet: Fig4__Pre__P-PC
			2015_06_28_0018					2015_09_30_0024					2017_04_25_0026				2017_05_19_0015					2017_05_19_0029					2017_05_19_0040					2017_05_19_0045
			rel peak	rel peak	rel peak	rel peak	rel peak	rel peak	rel peak	av.			Tau onset	tau2	tau2	tau2	tau2	tau2	tau2				rel ampl	rel ampl	rel ampl	rel ampl	rel ampl	rel ampl	rel ampl				rel auc	rel auc	rel auc	rel auc	rel auc	rel auc	rel auc				Tau deact	Tau deact	Tau deact	Tau deact	Tau deact	tau1	Tau deact
	6		1	1	1	1	1	1	1	1	0		299.991	250.153	217.129	125.319	191.724	657.156	165.136	272.373	67.6115		5.8267	6.27719	1.51302	1.70974	2.78367	4.02962	3.10139	3.6059	0.709685		2573.58	2254.49	1010.03	720.609	1771.96	1667.61	2193.92	1741.74	255.597		267.221	272.757	367.199	239.968	291.336	341.789	247.803
	11		1.14675	1.00232	1.32581	0.91395	0.948627	1.00104	0.796435	1.01927	0.0648392		307.744	230.312	170.054	124.073	211.114	674.363	114.828	261.784	73.1708		5.46629	5.91969	2.01673	1.58374	2.686	3.87242	3.27627	3.54588	0.625451		2407.52	2149.43	1262.81	662.022	1706.53	1589.58	2357.96	1733.69	239.459		273.295	256.975	335.123	214.109	277.356	336.498	294.647
	16		1.02958	0.897957	1.39174	0.786737	1.05534	0.967522	0.883405	1.00176	0.0736662		297.77	236.964	160.7	120.748	194.807	573.426	130.102	244.931	59.5577		5.33146	5.5842	1.92853	1.55859	2.68794	3.82598	3.16514	3.44026	0.593408		2292.6	2012.62	1276.72	646.768	1743.91	1581.3	2301.36	1693.61	224.39		269.086	251.912	357.373	228.105	305.092	327.585	266.882
	26		0.975025	0.869912	1.229	0.79109	0.962374	0.858052	0.907397	0.941836	0.053472		305.046	228.9	150.113	108.712	188.992	760.172	127.648	267.083	85.9594		5.04491	5.45549	2.08069	1.52521	2.71125	3.82974	2.92269	3.36714	0.557749		2188.5	1993.19	1468.3	635.542	1705.72	1481.15	2046.9	1645.61	198.74		277.471	253.83	426.832	209.034	280.411	317.614	245.162
	46		0.942172	0.909748	1.18358	0.821016	1.02202	0.91699	0.940729	0.962322	0.0431438		312.49	204.046	130.083	97.6481	169.844	690.034	113.837	245.426	78.9903		5.96027	5.55517	2.23418	1.43489	2.72624	3.59818	3.09624	3.51502	0.634586		2280.82	2059.27	1575.97	590.601	1704.77	1451.53	2125.06	1684	215.651		264.267	254.974	370.122	217.6	254.638	325.598	242.6
	86		0.864398	0.872645	1.12353	0.814016	1.12817	0.811594	0.9797	0.942007	0.0519271		289.106	169.247	111.526	77.1173	184.58	618.972	114.584	223.59	70.8769		5.26156	5.56023	2.34975	1.4677	2.63035	3.62683	3.20962	3.44372	0.569784		2335.73	2116.97	1716.52	609.894	1701.74	1420.32	2014.71	1702.27	215.133		256.125	264.681	431.104	218.625	268.758	303.268	204.351
	166		1.03048	0.866406	1.03815	0.821856	1.01242	0.891092	0.987874	0.949753	0.0332579		270.449	140.15	101.917	74.7466	173.79	512.864	152.556	203.782	56.6055		4.96455	5.61212	2.38315	1.58949	2.84355	4.14547	3.05761	3.51371	0.546533		2245.76	2168.06	1768.58	662.816	1763.19	1750.73	2174.27	1790.49	205.378		298.974	267.178	427.952	199.209	273.086	309.624	238.465
	326		0.911015	0.867035	1.07182	0.89682	0.923869	0.894043	0.839265	0.914838	0.0282393		188.354	112.663	103.022	50.1747	129.911	386.835	109.885	154.406	41.6918		5.25843	5.81756	2.46988	1.57961	2.67346	4.32976	3.27679	3.62936	0.587905		2553.7	2309.44	1809.46	678.993	1767.83	1912.33	2263.09	1899.26	231.119		283.301	253.219	408.086	228.841	297.647	334.969	308.717
	646		1.06491	0.908751	1.00865	0.876013	0.931562	0.88787	1.24621	0.989139	0.0500094		158.121	96.9714	99.4932	57.6739	118.134	279.979	94.7567	129.304	27.5666		5.446	5.91071	2.54487	1.75417	2.50695	4.87317	3.24807	3.75485	0.617969		2632.62	2396.31	2033.3	744.078	1691.25	2219.57	2251.2	1995.48	236.15		314.112	272.606	482.467	211.408	310.117	319.732	239.065
	1286		0.979591	0.92836	0.982662	0.825994	0.926211	0.923904	0.81326	0.911426	0.0255032		148.612	90.3386	93.3113	58.4104	128.653	224.424	87.939	118.813	20.8175		5.58454	5.94292	2.77468	1.75133	2.59156	5.55743	2.98984	3.88461	0.657921		2699.68	2427.29	2225.75	764.924	1655.38	2741.12	2191.03	2100.74	261.951		297.246	281.794	482.583	239.341	252.486	357.963	239.809
	2566		1.01523	1.17357	0.889525	0.866668	0.94986	0.874196	0.917142	0.95517	0.041254		142.291	74.6632	93.4252	58.1404	115.319	201.464	94.6196	111.417	18.1738		5.98162	6.01538	2.67715	1.92627	2.67501	6.01901	2.96199	4.03663	0.706077		3023.77	2493.44	2192.71	803.044	1722.23	2982.79	2063.04	2183	291.711		291.748	294.244	509.209	200.345	284.337	348.575	231.667
[truncated: 2 more columns]

## Sheet: Fig5__Pre__A-PC
			CE	CG	CJ	CL	CN	CO	CP	CT	CW	CX	CY	CZ	DB		CE	CG	CJ	CL	CN	CO	CP	CT	CW	CX	CY	CZ	DB		CE	CG	CJ	CL	CN	CO	CP	CT	CW	CX	CY	CZ	DB		CE	CG	CJ	CL	CN
			2015_06_21_0026							2015_06_19_0037							2015_08_17_0012							2017_05_23_0024						2017_05_23_0029							2017_05_23_0038							2017_05_23_0052
			rel peak											rel auc											A1								A2														tau1
7		6	1	1	1	1	1	1	1	1	0			501.037	609.34	156.608	350.248	419.173	362.981	550.684	421.439	57.1075			0.02	0.0747972	0.01	0.0828167	0.155828	0.0349111	0.002	0.0543361	0.920939	0.925203	0.99	0.917183	0.844172	0.965089	0.998	0.937227	0.0199556		0.0205816				15.0895	15.3417	5.92864
		11	1.077	1.32856	0.789281	0.722176	0.824859	0.896781	0.611359	0.892859	0.0909586			490.476	611.982	127.499	258.144	256.601	297.04	316.503	336.892	61.2877			0.0387573	0.0384588	0.01	0.0363108	0.0402134	0.0445545	0.041486	0.035683	0.961243	0.961541	0.99	0.963689	0.959787	0.955446	0.958514	0.964317	0.00439174		0.00439174				19.0168	18.8967	5.44475
		16	1.05919	1.37483	0.734622	0.648406	0.692222	0.756919	0.516029	0.82603	0.11065			489.518	587.537	114.702	250.423	255.001	245.858	270.005	316.149	61.609			0.0334514	0.0334196	0.11515	0.1	0.1	0.0352788	0.0354713	0.0646816	0.966549	0.96658	0.88485	0.9	0.9	0.964721	0.964529	0.935318	0.0144026		0.0144026				8.44678	17.4472	5.95051
		26	1.21417	1.62432	0.69935	0.653117	0.737369	0.776906	0.269129	0.85348	0.1654			523.568	598.144	113.564	215.131	233.916	184.054	202.803	295.883	70.3685			0.0505508	0.0507067	0.212505	0.0706215	0.22	0.247005	0.0656487	0.131005	0.949449	0.949293	0.787495	0.929379	0.78	0.752995	0.934351	0.868995	0.0341065		0.0341065				10.7491	20.7409	5.99739
		46	1.49888	1.79554	0.751232	0.802167	0.878393	1.06361	0.511045	1.04298	0.170975			539.652	599.314	111.15	208.541	251.526	250.686	227.857	312.675	68.9915			0.012	0.117037	0.105616	0.2	0.316282	0.187078	0.143195	0.154458	0.988	0.882963	0.894384	0.8	0.683718	0.812922	0.856805	0.845542	0.0357012		0.0357012				10.8189	20.152	7.34342
		86	1.94729	1.99464	1.05082	0.890717	1.00169	1.43135	0.872196	1.31267	0.183826			536.462	615.28	131.318	269.221	268.542	260.948	325.844	343.945	64.4355			0.110177	0.114097	0.194101	0.143431	0.3	0.540525	0.489531	0.270266	0.889823	0.885903	0.805899	0.856569	0.7	0.459475	0.510469	0.729734	0.0679473		0.0679473				18.8609	18.7902	5.84296
		166	2.45936	2.1529	1.2996	1.08994	1.52571	1.68087	1.35243	1.65154	0.185765			574.052	633.624	156.792	328.986	407.482	352.729	478.865	418.933	60.7627			0.222113	0.205436	0.3	0.77	0.578209	0.568948	0.77665	0.488765	0.777887	0.794564	0.7	0.23	0.421791	0.431052	0.22335	0.511235	0.0930196		0.0930196				40.1368	27.2147	5.27556
		326	2.82069	2.19887	1.41146	1.3901	1.77609	2.17424	2.30354	2.01071	0.19538			598.257	637.125	167.246	417.523	510.175	469.938	756.339	508.086	71.0876			0.422769	0.323196	0.440155	0.536625	0.743629	0.795721	0.919261	0.597336	0.577231	0.676804	0.559845	0.463375	0.256371	0.204279	0.0807391	0.402664	0.0842915		0.0842915				38.9384	24.7573	6.10305
		646	2.95956	2.15505	1.45342	1.63626	2.13536	2.40417	2.70786	2.20738	0.204563			643.709	650.758	196.849	570.225	775.568	579.888	1112.65	647.092	103.097			0.670318	0.472219	0.596815	0.47	0.884323	0.881806	1	0.710783	0.329682	0.527781	0.403185	0.53	0.115677	0.118194	0	0.289217	0.0805527		0.0805527				37.3177	29.0668	5.21493
		1286	2.88557	2.08942	1.43789	1.89034	2.64151	2.52429	3.20753	2.38236	0.231009			664.88	671.066	236.926	770.02	1199.3	778.802	1480.67	828.809	151.989			0.562634	0.587981	0.789327	0.735209	0.881255	0.880035	1	0.776635	0.437366	0.412019	0.210673	0.264791	0.118745	0.119965	0	0.223365	0.0607087		0.0607087				12.2651	17.1927	6.6876
		2566	2.86721	2.07933	1.49589	2.31672	3.2626	3.03548	3.72636	2.68337	0.288284			724.877	712.63	302.372	1074.3	1657.14	1037.49	2049.2	1079.71	225.729			0.653757	0.753228	0.854502	0.735899	0.893607	0.904283	1	0.827897	0.346243	0.246772	0.145498	0.264101	0.106393	0.0957171	0	0.172103	0.0449454		0.0449454				11.0832	11.1827	5.38122
		6	1.00504	1.04028	1.13265	0.845388	0.871044	0.89405	0.742325	0.840325															0.00601891	0.00488142	0.00939696	0.0012975	0.0633423	0.0293014	0.0343366	0.0405214
		11	1.04174	1.07183	1.24584	0.792056	0.825806	0.869461	0.611661	0.780028															0.011007	0.00893106	0.0171603	0.00237746	0.113052	0.0530624	0.0620481	0.0730321
		16	1.09507	1.10149	1.35426	0.7706	0.810135	0.873303	0.532983	0.757918															0.01597	0.0129642	0.0248627	0.00345626	0.160123	0.0762417	0.0889643	0.104441
		26	1.22466	1.15521	1.54517	0.766665	0.819895	0.917402	0.473359	0.77262															0.0258215	0.0209814	0.0400871	0.00561035	0.246904	0.120912	0.140502	0.164103
		46	1.49484	1.24197	1.81253	0.79673	0.88676	1.04002	0.533207	0.878375															0.0452296	0.0368209	0.0698264	0.00990458	0.394491	0.203877	0.234995	0.271767
		86	1.93465	1.35205	2.0442	0.8677	1.03483	1.27472	0.809553	1.10261															0.0828935	0.0677352	0.126569	0.0184375	0.608565	0.347056	0.393958	0.447279
		166	2.45365	1.43925	2.12886	1.0015	1.30146	1.65288	1.33276	1.42997															0.153823	0.126619	0.229882	0.0352833	0.836417	0.560794	0.619653	0.681597
		326	2.82057	1.46866	2.13599	1.23661	1.72742	2.14342	2.09615	1.76959															0.279648	0.233464	0.401293	0.0681126	0.971431	0.801275	0.850193	0.894338
		646	2.92366	1.47089	2.13603	1.60024	2.27409	2.56505	2.91207	1.96141															0.477951	0.40954	0.638149	0.130458	0.999129	0.959316	0.97676	0.988364
		1286	2.92933	1.4709	2.13603	2.03844	2.7345	2.73366	3.39928	1.99755															0.725815	0.649647	0.867822	0.242914	0.999999	0.998295	0.999441	0.999859
		2566	2.92934	1.4709	2.13603	2.36604	2.91194	2.75095	3.50061	1.99852															0.924367	0.87665	0.982363	0.426076	1	0.999997	1	1
		tau1	10.9932	18.9424	11.8787	7.04634	8.3461	7.706	14.056	10
		top	2.92934	1.4709	2.13603	2.47454	2.92913	2.75111	3.50388	1.99852	2.51871	0.247006													1	1	1	1	1	1	1	1		1	0
		bottom	0.730581	0.975867	0.706864	0.710275	0.699279	0.721811	0.10051	0.5375	0.663598	0.100922													0	0	0	0	0	0	0	0		0	0
		tau2	108.435	60.3689	31.3572	920.145	527.346	270.362	369.285	175.885	192.916	119.843													993.855	1226.15	635.5	4621.28	91.6907	201.753	171.723	145.049		448.905	537.454
			2.53684e-05	0.0016227	0.0175951	0.0239048	0.0166297	0.0112253	0.0663964	0.0254961															0.000195471	0.00488821	3.63656e-07	0.00664537	0.00855352	3.14682e-05	0.00104566	0.000190845
			0.00124315	0.0659098	0.208442	0.00488321	8.96688e-07	0.000746422	9.12898e-08	0.012731															0.000770079	0.000871889	5.12695e-05	0.00115147	0.0053054	7.2384e-05	0.000422798	0.00139495
			0.00128776	0.0747114	0.383955	0.0149312	0.0139036	0.0135453	0.000287419	0.00463922															0.0003056	0.000418421	0.0081518	0.00932069	0.00361476	0.00167796	0.00286151	0.00158082
			0.000109944	0.220062	0.715405	0.0128932	0.00681055	0.0197391	0.0417096	0.0065383															0.000611539	0.000883594	0.0297281	0.00422644	0.0007238	0.0158995	0.00560298	0.00109543
			1.63101e-05	0.30643	1.12636	2.9568e-05	7.00056e-05	0.000556592	0.000491168	0.0270948															0.00110421	0.00643462	0.0012809	0.0361363	0.00611667	0.000282204	0.0084273	0.0137612
			0.000159908	0.412932	0.986815	0.000529772	0.00109858	0.0245309	0.00392417	0.0441253															0.0007444	0.00214938	0.00456054	0.0156234	0.0952123	0.0374305	0.00913425	0.0313336
			3.26691e-05	0.509296	0.687668	0.007821	0.0502912	0.000783358	0.000387198	0.0490957															0.00466354	0.00621208	0.0049165	0.539809	0.0666711	6.64935e-05	0.0246478	0.0371843
			1.46448e-08	0.533199	0.52495	0.0235607	0.0023686	0.000949403	0.0430124	0.0581387															0.0204835	0.00805185	0.00151027	0.219504	0.0518936	3.08507e-05	0.00477043	0.0882101
			0.00128902	0.468076	0.465961	0.0012977	0.0192466	0.0258835	0.0416979	0.060505															0.0370052	0.00392863	0.00170849	0.115289	0.0131802	0.00600793	0.000540109	0.0770512
			0.00191484	0.382565	0.487401	0.0219328	0.00864862	0.0438385	0.0367709	0.148084															0.026628	0.00380259	0.00616139	0.242354	0.0141001	0.0139854	3.12832e-07	0.0498291
			0.00386047	0.370193	0.409781	0.00243163	0.122958	0.0809583	0.0509625	0.469022															0.0732298	0.0152331	0.0163485	0.0959908	0.0113194	0.0091612	1.04947e-13	0.0296196
					11.1394																						2.32913				2.32913
[truncated: 15 more columns]

## Sheet: Fig6__Pre__A-10PC
			CE	CG	CJ	CL	CN	CO	CP	CT	CW	CX	CY	CZ	DB		CE	CG	CJ	CL	CN	CO	CP	CT	CW	CX	CY	CZ	DB		CE	CG	CJ	CL	CN	CO	CP	CT	CW	CX	CY	CZ	DB		CE	CG	CJ	CL	CN
			2015_09_14_0045							2015_09_15_0014							2015_09_24_0027							2015_09_24_0032							2015_09_24_0037							2015_09_30_0044
			rel peak	rel peak	rel peak	rel peak	rel peak	rel peak				rel auc	rel auc	rel auc	rel auc	rel auc	rel auc				A1	A1	A1	A1	A1	A1		A2	A2	A2	A2	A2	A2							tau1	tau1	tau1	tau1	tau1	tau1		tau2	tau2	tau2
7		6	1	1	1	1	1	1	1	0		2297.85	1909.17	7039.47	1202.54	2072.1	2988.32	2918.24	857.363		0	0	0	0	0	0	0	1	1	1	1	1	1	1	0	0											251.59	163.026	694.746
	0.35304	11	1.1701	1.56872	1.26411	1.09297	1.50965	1.15658	1.29369	0.0811415		1977.65	1660.53	7444.68	967.615	1927.32	2909.06	2814.48	960.513		0	0	0	0	0	0	0	1	1	1	1	1	1	1	0	0											174.059	161.81	645.773
	0.576866	16	1.1713	1.82979	1.5275	1.0376	1.57106	1.19054	1.38797	0.123407		1982.75	1576.17	9155.36	906.528	1810.59	2836.72	3044.69	1248.5		0	0	0	0	0	0	0	1	1	1	1	1	1	1	0	0											182.572	161.261	569.359
	0.037943	26	1.36324	1.97436	1.53644	0.93474	1.47806	1.2107	1.41626	0.142205		1812.34	1470.01	7197.18	790.31	1753.7	2770.26	2632.3	949.479		0	0	0	0	0	0	0	1	1	1	1	1	1	1	0	0											195.399	152.607	578.945
	0.0308048	46	1.27702	2.27974	1.86454	1.12726	1.60944	1.29933	1.57622	0.177663		1856.05	1324.41	7117.4	931.619	1636.9	2798.67	2610.84	936.969		0	0	0	0	0	0	0	1	1	1	1	1	1	1	0	0											175.929	147.013	558.351
	0.21965	86	1.26093	2.75309	2.18975	1.19197	1.96998	1.54007	1.81763	0.245979		1673.28	1180.8	7744.03	920.841	1546.31	2794.46	2643.29	1053.41		0	0	0	0	0	0	0	1	1	1	1	1	1	1	0	0											144.144	134.495	583.606
	0.695537	166	1.53711	3.54518	2.86271	1.36784	2.07397	1.99523	2.23034	0.338276		1684.74	1180.94	8496.18	987.976	1457.97	2768.81	2762.77	1174.57		0	0	0	0	0	0	0	1	1	1	1	1	1	1	0	0											137.265	143.647	476.4
	0.78217	326	1.69807	3.64914	3.17059	1.29363	2.5592	2.77072	2.52356	0.362496		1767.83	1077.41	8768.46	875.476	1381.12	2781.83	2775.36	1229.76		0.224329	0	0	0	0.00224037	0	0.0377616	0.775671	1	1	1	0.99776	1	0.962238	0.0373153	0.0373153				43.189						43.189	193.705	126.499	404.436
	0.342456	646	1.39622	3.33768	2.99417	1.32948	2.39409	3.67866	2.52172	0.405461		1646.75	999.424	8103.35	910.507	1316.34	2802.81	2629.86	1129.83		0.144493	0.0483354	0.00182033	0	0.0192739	0	0.0356538	0.855507	0.951665	0.99818	1	0.980726	1	0.964346	0.0230667	0.0230667				32.4108	7.4328			29.0723		22.972	182.165	112.029	347.871
	0.199127	1286	1.2649	2.76351	2.89971	1.40315	2.35787	4.39077	2.51332	0.467329		1636.65	968.165	7783.33	1020.07	1237.31	2801.93	2574.57	1077.77		0.194832	0.0460419	0.0608187	0	0.05	0	0.0586155	0.805168	0.953958	0.939181	1	0.95	1	0.941385	0.0292482	0.0292482				37.0928	11.8768	47.652		17.1936		28.4538	168.499	125.987	292.633
	0.332476	2566	1.24358	2.51316	3.17954	1.22885	2.29001	4.86296	2.55302	0.555793		1550.5	916.293	8100.48	869.605	1218.7	2977.01	2605.43	1143.62		0.205714	0.187517	0.0873684	0	0.12	0	0.1001	0.794286	0.812483	0.912632	1	0.88	1	0.8999	0.0362373	0.0362373				24.3476	26.6296	27.5106		20		24.6219	193.908	143.462	215.425
[truncated: 8 more columns]

## Sheet: Fig7__Pre__10P-AC
			2015_09_16_0007											2015_09_16_0009											2015_09_16_0011											2015_09_25_0037											2015_09_16_0045
			rel peak	rel peak	rel peak	rel peak	rel peak	rel peak	rel peak				rel auc	rel auc	rel auc	rel auc	rel auc	rel auc	rel auc					tau1	tau1	tau1	tau1	tau1	tau1
		6	1	1	1	1	1	1	1	1	0		566.76	2621.73	881.655	692.535	489.934	676.958	2223.38	944.197	330.854			7.11084	12.5956	11.2768	9.32784	7.60286	16.2547	10.6948	1.40402
		11	1.09538	1.96536	0.958295	1.59215	0.998912	1.32842	1.06657	1.28644	0.140691		594.514	2823.28	1024.01	776.406	481.711	813.703	2274.82	1025.15	345.408			7.66004	10.8422	10.4852	9.98808	7.30504	16.7952	10.5126	1.3938
		16	1.09907	2.09393	0.875486	1.49835	0.981295	1.22356	1.03459	1.25804	0.158549		604.691	2962.63	991.459	745.182	474.469	770.654	2261.27	1012.97	362.681			7.97585	11.0352	10.7664	9.88888	7.3663	15.5911	10.4373	1.19468
		26	1.09664	2.15727	0.845767	1.40486	0.959003	1.15041	1.25872	1.26752	0.163777		619.107	3098.63	966.993	715.567	469.443	736.731	2035.59	990.373	367.402			7.74343	10.2699	10.0482	10.0472	7.4883	14.5825	10.0299	1.04039
		46	1.13835	2.19931	0.822228	1.34734	0.966934	1.13217	1.17394	1.25432	0.169437		620.611	3126.83	932.799	694.818	467.618	717.125	2262.26	993.316	385.68			7.93334	9.72958	9.8364	9.45185	7.28091	11.458	9.28168	0.608133
		86	1.13405	2.25646	0.809396	1.26655	0.975916	1.1107	0.95033	1.21477	0.182343		624.1	3187.86	910.626	665.779	468.564	703.349	2343.59	989.934	399.57			7.60016	9.89721	9.22967	9.25747	6.79657	12.5777	9.22647	0.821197
		166	1.13289	2.25272	0.777686	1.26047	0.978828	1.1086	1.26417	1.25362	0.178352		624.488	3229.92	913.727	646.156	468.944	697.779	2519.53	997.382	416.854			8.12967	9.16285	8.84273	8.93475	7.0778	12.5405	9.11472	0.751981
		326	1.15218	2.27005	0.783318	1.18383	0.976424	1.1246	1.39436	1.26925	0.181335		637.585	3251.64	891.725	635.698	465.082	696.505	2704.43	1004.17	433.277			8.07121	8.9126	9.02681	8.96939	6.83831	11.7264	8.92412	0.656847
		646	1.15412	2.27948	0.77538	1.18445	0.983464	1.14754	1.39942	1.27484	0.182452		653.49	3269.53	896.084	635.237	456.821	690.299	3215.23	1030.39	477.581			7.96352	8.52142	9.56024	8.7282	6.55772	14.7739	9.35082	1.15837
		1286	1.19403	2.27464	0.797446	1.12951	0.994595	1.15016	1.71903	1.32277	0.190891		669.64	3290.15	915.629	608.02	444.934	683.49	2821.49	1007.33	447.078			7.92572	8.76746	8.82285	9.07624	6.49621	12.8323	8.9868	0.86023
		2566	1.20616	2.27706	0.799019	1.07906	0.982411	1.13945	1.559	1.29174	0.186221		677.152	3310.77	905.215	590.807	436.872	669.704	2817	998.303	450.396			8.18052	7.73683	9.06237	8.55957	6.03934	12.0717	8.60839	0.811295
																														9.56069	0.292753
		11			0.0879361
		16			0.154751
		26			0.15349
		46			0.184031
		86			0.283456
		166			0.204854
		326			0.188125
		646			0.182693
		1286			0.141816
		2566			0.168247

## Sheet: Fig8__Co__P-PC
			CE	CG	CJ	CL	CN	CO	CP	CT	CW	CX	CY	CZ	DB		CE	CG	CJ	CL	CN	CO	CP	CT	CW	CX	CY	CZ	DB		CE	CG	CJ	CL	CN	CO	CP	CT	CW	CX	CY	CZ	DB		CE	CG	CJ	CL	CN
			2015_09_30_0007														2015_09_30_0022														2015_09_30_0026														2015_09_30_0032
																									0.52823	0.384761	0.666093	0.767485	0.422892	0.736101	0.585737	0.58426	0.0664084			-3877.81	-1847.62	-6214.44	-1509.58	-1629.49	-3517.39
																									431.139	141.183	92.5452	50.9704	34.0238	89.4722	94.1765	97.7815	60.2012
			tau slow	tau slow	tau slow	tau slow	tau slow		tau fast	tau fast	tau fast	tau fast	tau fast					A-slow	A-slow	A-slow	A-slow	A-slow	A-slow		2.63462	2.14978	1.96635	1.70732	1.53178	1.95169		139.889	2.41476			Peak	Peak	Peak	Peak	Peak	Peak				Min	Min	Min	Min	Min
5		8	363.757	203.493	182.305	159.552	262.338	224.071	23.5498	10.6958	10.5937	10.1545	17.1059	13.5897	36.5958	2.61984		0.442297	0.635314	0.423258	0.393757	0.602894	0.274264	0.461964	0.557703	0.364686	0.576742	0.606243	0.397106	0.725736	0.538036	0.0552812				-3877.81	-1847.62	-6214.44	-1509.58	-1629.49	-3517.39	-3099.39	818.272		-4140.78	-2202.83	-3541.01	-951.751	-3335.36
		16	336.801	274.751	314.374	229.605	288.742	286.451	18.188	25.4811	17.9328	18.1266	12.7857	18.0692	18.2477	2.0242		0.485397	0.583579	0.387401	0.340013	0.837942	0.444546	0.513146	0.514603	0.416421	0.612599	0.659987	0.162058	0.555454	0.486854	0.0734203				-4077.05	-2020.5	-6138.26	-1670.81	-1807.65	-3483.71	-3199.66	778.495		-4677.4	-3321.82	-4942.66	-2438.29	-5695.7
		40	374.04	255.642	382.949	207.402	194.176	271.481	33.6192	20.7174	38.3882	20	45.0572	29.9491	40.3926	4.92054		0.486401	0.810838	0.585415	0.724356	0.825339	0.52865	0.660167	0.513599	0.189162	0.414585	0.275644	0.174661	0.47135	0.339833	0.0597726				-4026.89	-1961.57	-6110.53	-1700.21	-1918.04	-3354.3	-3178.59	764.264		-4787.11	-4660.99	-6612.41	-3754.56	-8343.57
		136	391.247	262.895	484.272	258.759	240.341	314.927	33.7581	39	34.762	22	44.8276	33.955	47.5063	3.76229		0.739302	0.832196	0.853186	0.89	0.960653	0.832125	0.851244	0.260698	0.167804	0.146814	0.11	0.0393475	0.167875	0.148756	0.0298526				-3922.84	-2186.28	-5947.5	-1708.67	-1904.63	-3178.15	-3141.35	720.577		-5381.15	-7149.82	-10204.2	-6920.14	-11511.1
		520	341.984	236.782	417.642	211.481	272	286.946	53.0718	39.8615	60	35	25.1632	40.7081	37.5085	6.25186		0.786167	0.921801	0.886087	0.899742	0.997294	0.868258	0.893225	0.213833	0.0781994	0.113913	0.100258	0.00270582	0.131742	0.106775	0.028181				-3838.71	-2134.09	-5858.67	-1630.16	-1859.76	-2801.46	-3020.48	716.624		-4280.19	-6719.43	-9880.22	-6336.51	-11100.3
		2056	356.412	243.379	471.058	208.072	253.155	292.807	24.6213	45.264	58.5918	25	50	38.2263	48.0045	6.82807		0.873759	0.931175	0.938165	0.952665	0.99	0.933642	0.936567	0.126241	0.0688253	0.0618354	0.0473352	0.01	0.066358	0.0634326	0.0153832				-3563.85	-2126.08	-5278.17	-1622.2	-1777.74	-2221.55	-2764.93	630.505		-4042.54	-6629.02	-9231.43	-6092.59	-10719.6
															32.7387
								1.30676	0.0329712					2.81288	41.7377									8	0.518519	0.363565	0.610931	0.656002	0.334283	0.67314	0.538036
																								16	0.508987	0.343536	0.560338	0.560714	0.26424	0.615565	0.494219					Rel Peak	Rel Peak	Rel Peak	Rel Peak	Rel Peak	Rel Peak				Rel Min	Rel Min	Rel Min	Rel Min	Rel Min
		8																						40	0.481427	0.289832	0.432338	0.350145	0.130512	0.470738	0.383039					1	1	1	1	1	1	1	0		1.06781	1.19225	0.569804	0.630474	2.04687
		16																						136	0.385326	0.146838	0.15322	0.0532449	0.00776722	0.16099	0.13821					1.05138	1.09357	0.987741	1.1068	1.10933	0.990425	1.05654	0.0251524		1.2062	1.79789	0.795351	1.61521	3.49539
		40																						520	0.158131	0.00967408	0.00241706	2.84705e-05	9.7436e-08	0.00220231	0.00234275					1.03844	1.06167	0.983279	1.12628	1.17708	0.953633	1.05673	0.0377911		1.23449	2.5227	1.06404	2.48716	5.12036
		136																						2056	0.00448514	1.82261e-07	1.49684e-10	2.32736e-18	2.41288e-27	7.71249e-11	1.93406e-10					1.01161	1.1833	0.957045	1.13188	1.16885	0.903553	1.05937	0.0527756		1.38768	3.86975	1.64201	4.58415	7.06423
		520																																		0.989917	1.15505	0.942751	1.07988	1.14131	0.79646	1.01756	0.0611055		1.10376	3.6368	1.58988	4.19753	6.81213
		2056																							0.0015354	1.25662e-06	0.00116892	0.00247603	0.00394672	0.00276633	1.25706e-13					0.919037	1.15071	0.84934	1.0746	1.09098	0.63159	0.952711	0.0867454		1.04248	3.58787	1.48548	4.03595	6.5785
																									3.15447e-05	0.00531215	0.00273115	0.00985513	0.0104412	0.00361333	5.42443e-05
																									0.001035	0.0101344	0.000315174	0.00555054	0.00194908	3.74669e-07	0.00186675					0.919037	1.15071	0.84934	1.0746	1.09098	0.63159	0.952711	0.0867454		0.976275	3.00932	2.607	6.40145	3.21393
																									0.0155321	0.000439561	4.10371e-05	0.00322114	0.000997313	4.74025e-05	0.000111225
																									0.00310265	0.00469572	0.0124314	0.010046	7.32093e-06	0.0167804	0.0109061
																									0.0148246	0.00473689	0.00382361	0.00224062	0.0001	0.00440339	0.00402369
																									0.177297
[truncated: 11 more columns]

## Sheet: Fig9__Co__A-AC
			2015_09_25_0011									2015_10_01_0009									2015_10_01_0013									2015_10_01_0017									2015_10_01_0026									2015_10_01_0021
6			Tau decay	Tau decay	Tau decay	Tau decay	Tau decay	Tau decay
		8	7.18033	5.80252	8.06188	6	4.52395	9.41677	6.83091	0.716336
		16	8.03805	8.12392	10.7882	10.5	6.7603	14.4465	9.77616	1.12851
		40	7.86574	7.61081	12.6527	10	4.31972	16.7058	9.85913	1.77402
		136	11.6027	9.67539	15.1965	11.1232	4.18615	16.6743	11.4097	1.80151
		520	13.5137	7.82335	13.8353	11	6.32315	13.0113	10.9178	1.2952
		2056	13.7071	7.32416	9.19657	12	3.99308	8.51093	9.12197	1.40503
									10.217	1.43868

## Sheet: Fig10__Co__A-PC
			2017_05_23_0008							2017_05_23_0011					2017_05_23_0016					2017_05_23_0023					2017_05_23_0027						2017_05_23_0036						2017_05_23_0042				2017_05_23_0047						2017_05_23_0057
														1	1	1	1	1	1	1	1	1		1				1325.16
														4169.76	2808.71	2047.81	6654.91	10901.4	2870.71	7433.33	6451.36	13869.1		4726.52	0.000800084		5303.96	1.91762
			A slow	A slow	A slow	A slow	A slow	A slow	A slow	A slow	A slow			3.62011	3.44851	3.31129	3.82314	4.03748	3.45799	3.87118	3.80965	4.14205					3.7246	0.282763										tau fast	tau fast	tau fast	tau fast	tau fast	tau fast	tau fast	tau fast	tau fast
9		8	0.000311766	0.000311766	0.0001	0.001	0.001	0.001	0.001	0.001	0.001	0.000747059		0.999688	0.999688	0.9999	0.999	0.999	0.999	0.999	0.999	0.999	0.999253	0.998309	8.913e-07	0.000128102												6.70282	4.75385	4.32604	4.34154	4.28509	3.59667	4.153	3.89904	7.45141	4.83438	0.441281
		16	0.000998708	0.000998708	0.000998708	0.000998708	0.000998708	0.000983772	0.000995724	0.000998708	0.000998708	0.000996717		0.999001	0.999001	0.999001	0.999001	0.999001	0.999016	0.999004	0.999001	0.999001	0.999003	0.996621	5.67733e-06	1.65119e-06												11.1864	9.0401	11.6464	5.68063	6.04254	5.46172	6.94396	7.14306	10.9143	8.22878	0.833803
		40	0.001	0.001	0.001	0.001	0.001	0.0282223	0.00910142	0.001	0.00099993	0.00492485		0.999	0.999	0.999	0.999	0.999	0.971778	0.990899	0.999	0.999	0.995075	0.991573	1.22663e-05	0.00304605												16.2084	13.6527	16.4459	8.15374	9.13026	6.58294	9.4995	8.31069	14.3195	11.3671	1.25952
		136	0.001	0.001	0.001	0.0436648	0.0282544	0.0202711	0.01	0.001	0.01	0.01291		0.999	0.999	0.999	0.956335	0.971746	0.979729	0.99	0.999	0.99	0.98709	0.971636	0.000238819	0.00502746												17.0152	17.6202	22.2407	9.78508	11.3881	8.8472	7.47439	11.6744	24.275	14.48	2.01639
		520	0.001	0.0343297	0.189476	0.0585866	0.0440085	0.279382	0.0193321	0.108829	0.01	0.0827715		0.999	0.96567	0.810524	0.941413	0.955991	0.720618	0.980668	0.891171	0.99	0.917228	0.895818	0.000458389	0.0314381												16.9468	21.6312	22.5539	12.3523	12.0498	8.90794	9.12066	12.6822	21.9459	15.3545	1.84355
		2056	0.435323	0.584596	0.664036	0.269138	0.171446	0.465168	0.257248	0.264752	0.145374	0.361898		0.564677	0.415404	0.335964	0.730862	0.828554	0.534832	0.742752	0.735248	0.854626	0.638102	0.64727	8.40417e-05	0.0611335												25.9529	25.3385	23.7244	14.2418	14.6332	7.96969	7.32299	11.8291	17.9965	16.5566	2.38416
																																					ttest										3.42475
		8												0.998083	0.997156	0.996101	0.998799	0.999266	0.997217	0.998924	0.998761	0.999423															0.000547304	1.66891	1.90164	2.69215	1.30844	1.41013	1.51855	1.67203	1.83201	1.46473	1.71873	0.137773
		16												0.99617	0.99432	0.992217	0.997599	0.998533	0.994442	0.99785	0.997523	0.998847															0.000204236	2.41815	2.87192	3.8016	1.87807	2.1307	1.83029	2.28738	2.13147	1.92171	2.36348	0.209449
		40												0.990453	0.98586	0.980656	0.994007	0.996337	0.986163	0.994633	0.993819	0.99712															0.000542401	2.53852	3.70652	5.14111	2.25383	2.65761	2.45983	1.79976	2.99416	3.25778	2.97879	0.328408
		136												0.96791	0.952733	0.935745	0.979771	0.987602	0.95373	0.98187	0.97914	0.990242															0.000194882	2.52831	4.55025	5.21352	2.84514	2.81203	2.47672	2.19616	3.25264	2.9452	3.20222	0.337547
		520												0.882755	0.830989	0.775746	0.924837	0.953419	0.834319	0.932436	0.92256	0.963201															0.000664444	3.87194	5.3301	5.48409	3.28036	3.4149	2.21585	1.7633	3.03385	2.41519	3.42329	0.432789
		2056												0.610746	0.480942	0.36641	0.734221	0.828118	0.488606	0.758364	0.727099	0.862221
																									0.0700019																10.928	1.01873
														2.57593e-06	6.41338e-06	1.44324e-05	4.05608e-08	7.09777e-08	3.17868e-06	5.72354e-09	5.72553e-08	1.7922e-07
														8.01507e-06	2.1918e-05	4.60239e-05	1.96741e-06	2.1895e-07	2.09238e-05	1.3327e-06	2.18542e-06	2.38001e-08
														7.30514e-05	0.000172672	0.000336487	2.49258e-05	7.08912e-06	0.000206932	1.39481e-05	2.68434e-05	3.53451e-06
														0.000966564	0.00214065	0.00400123	0.000549255	0.000251426	0.000675961	6.60905e-05	0.000394427	5.85308e-08
														0.0135129	0.018139	0.00120954	0.000274777	6.61581e-06	0.0129279	0.00232635	0.000985244	0.000718203
														0.00212235	0.00429521	0.000926983	1.12851e-05	1.90649e-07	0.00213681	0.000243733	6.64091e-05	5.76846e-05
[truncated: 11 more columns]

[truncated: 4 more sheets: Fig11__Co__P-AC, Fig12__Post__PC-P-PC, Fig12__Post__PC-A-PC, Fig12__Post__AC-P-AC]
